# Supplementary material for: Preparation of layered graphitic carbon nitride/montmorillonite nanohybrids for improving thermal stability of sodium alginate nanocomposites
Source: Royal Society of Chemistry journal article supplement (doi:10.1039/c4ra12897d), 2015-01-01
Supplement: c4ra12897d1.pdf [file c4ra12897d1.pdf]

Electronic Supplementary Information (ESI) for RSC Advances

Supporting information for

Preparation of layered graphitic carbon nitride/montmorillonite  
nanohybrids for improving thermal stability of sodium alginate  
nanocomposites

Lu Liu<sup>ab</sup>, Yongqian Shi<sup>bc</sup>, Bin Yu<sup>bc</sup>, Bibo Wang<sup>bc</sup>, Xiaming Feng<sup>bc</sup>, Hui Liu<sup>a</sup>,  
Panyue Wen<sup>bc</sup>, BiheYuan<sup>bc</sup>, Yuan Hu<sup>\*bc</sup> and Qilong Tai<sup>\*bc</sup>

<sup>a</sup>Nano Science and Technology Institute, University of Science and Technology of  
China, 166 Ren'ai Road, Suzhou, Jiangsu 215123, P.R. China

<sup>b</sup>State Key Laboratory of Fire Science, University of Science and Technology of  
China, 96 Jinzhai Road, Hefei, Anhui 230026, P.R. China. Email:  
yuanhu@ustc.edu.cn; Tel: 86-551-3601664; Fax: 86-551-3601664

<sup>c</sup>USTC-CityU Joint Advanced Research Centre, Suzhou Key Laboratory of Urban  
Public Safety, Suzhou Institute for Advanced Study, University of Science and  
Technology of China, 166 Ren'ai Road, Suzhou, Jiangsu 215123, P.R. China. E-mail:  
qltai@ustc.edu.cn; Fax: +86-512-/87181516; Tel: +86-512-/87161296

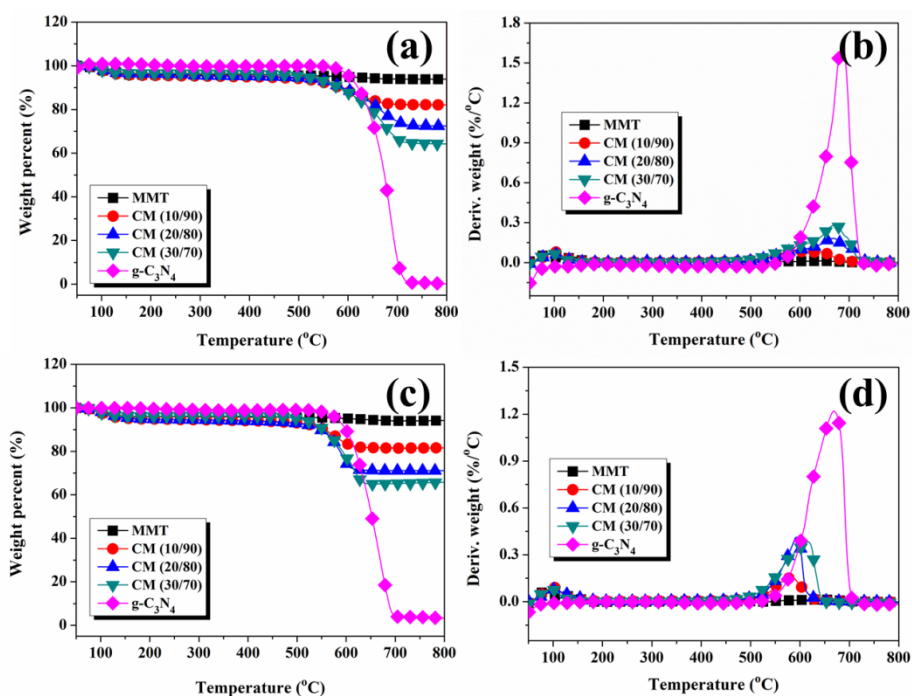

Figure 1S. TGA and DTG curves of g-C<sub>3</sub>N<sub>4</sub>, Na-MMT and their nanohybrids with different weight ratio under nitrogen (a, b) and air (c, d) conditions.
